# Supplementary material for: Genome-Wide Identification and Functions against Tomato Spotted Wilt Tospovirus of PR-10 in Solanum lycopersicum
Source: MDPI journal article supplement (doi:10.3390/ijms23031502), 2022-01-28
Supplement: s1 [file s1]

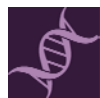

**Table S1.** Primers for PR-10, TSWV-cp protein, *Sw-5b*, *actin* gene.

|                   |                      |
|-------------------|----------------------|
| PR-10 -F          | GGTTCTTGATTTTGATAGCC |
| PR-10 -R          | GATTCCAATTTGTCACCAAG |
| TSWV-cp-F         | TCTGTGAGGCTTGCCATAAT |
| TSWV-cp-R         | AGCATACTCTTCCCTTTCT  |
| <i>SW-5b</i> -F   | TTGTCGTCGGAACCTGTA   |
| <i>SW-5b</i> -R   | TGATGAGGAGGTAGTGGGTT |
| <i>SlActin</i> -F | AGGCACACAGGTGTTATGGT |
| <i>SlActin</i> -R | AGCAACTCGAAGCTCATTGT |
